# Supplementary material for: Early Administration of the Phytocannabinoid Cannabidivarin Prevents the Neurobehavioral Abnormalities Associated With the Fmr1-Ko Mouse Model of Fragile X Syndrome
Source: Preprints.org preprint supplement (doi:10.20944/preprints202307.0140.v1), 2023-07-04
Supplement: Supplementary file 1 [file supplementary]

Article

# Early administration of the phytocannabinoid Cannabidivarin prevents the neurobehavioral abnormalities associated with the Fmr1-KO mouse model of Fragile X syndrome

Marika Premoli<sup>1,2, #</sup>, William Fyke<sup>1,3, #</sup>, Luigi Bellocchio<sup>4</sup>, Valerie Lemaire<sup>1</sup>, Marie Wolley-Roberts<sup>5</sup>, Bruno Bontempi<sup>1</sup> and Susanna Pietropaolo<sup>1\*</sup>

<sup>1</sup> Univ. Bordeaux, CNRS, EPHE, INCIA, UMR 5287, F-33000 Bordeaux, France

<sup>2</sup> University of Brescia, Department of Molecular and Translational Medicine, Brescia, Italy

<sup>3</sup> Graduate Program in Neural and Behavioral Science, SUNY Downstate Medical Center, 450 Clarkson Avenue, Brooklyn, NY 11203, USA

<sup>4</sup> University of Bordeaux, INSERM, U1215, NeuroCentre Magendie, Group Endocannabinoids and Neuroadaptation, Bordeaux 33077, France

<sup>5</sup> Jazz Pharmaceuticals, Inc., Cambridge, UK

# Shared first authorship

\* Correspondence: [susanna.pietropaolo@u-bordeaux.fr](mailto:susanna.pietropaolo@u-bordeaux.fr); Bordeaux University and CNRS, INCIA, UMR 5287, Bat B2, Allée Geoffroy St. Hilaire, CS 50023, 33615 Pessac cedex, France

**Citation:** Lastname, F.; Lastname, F.; Lastname, F. Title. *Cells* **2022**, *11*, x. <https://doi.org/10.3390/xxxxx>

Academic Editor: Firstname Lastname

Received: date

Accepted: date

Published: date

**Publisher's Note:** MDPI stays neutral with regard to jurisdictional claims in published maps and institutional affiliations.

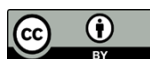

**Copyright:** © 2022 by the authors. Submitted for possible open access publication under the terms and conditions of the Creative Commons Attribution (CC BY) license (<https://creativecommons.org/licenses/by/4.0/>).

| Gene             | GenBank ID   | Forward Sequence (5'-3') | Reverse Sequence (5'-3') |
|------------------|--------------|--------------------------|--------------------------|
| Nono             | NM_023144    | CTGTCTGGTGCATTCCTGAACTAT | AGCTCTGAGTTCATTTTCCCATG  |
| Sdha             | NM_023281    | TACAAAGTGCGGGTCGATGA     | TGTTCCCCAAACGGCTTCT      |
| Ywhaz            | NM_011740    | CTTGTGAGGCTGTGACACAAACA  | CAAGAGTGTGCACGCAGACA     |
| Tuba4a           | NM_009447    | CCACTTCCCCCTGGCTACCTA    | CCACTGACAGCTGCTCATGGT    |
| Gapdh            | NM_008084    | TCAAGAAGGTGGTGAAGCAG     | TGGGAGTTGCTGTTGAAGTC     |
| IL-1b            | NM_008361    | TCGCTCAGGGTCACAAGAAA     | TCAGAGGCAAGGAGGAAAACAC   |
| IL-6             | NM_031168    | TACTCGGCAAACCTAGTGCGT    | ATTTTCTGACCACAGTGAGGAATG |
| IL-10            | NM_010548    | AGTTGTGAAGAACTCATGGGTCT  | TGCTGCAGGAATGATCATCAA    |
| TNF $\alpha$     | NM_013693    | GGCACTCCCCCAAAGATG       | GCCACAAGCAGGAATGAGAAG    |
| ITGAM<br>(CD11b) | NM_001082960 | CTCATCACTGCTGGCCTATACAA  | GCAGCTTCATTCATCATGTCCTT  |
| PTPRC<br>(CD45)  | NM_011210    | TGGGACAACGCAGACTCTCA     | CTGCACAGCCATGTTCTTTTCAT  |
| BDNF             | NM_007540    | CCCGTCTGTACTTTACCCTTTGG  | TGACTAGGGAAATGGGCTTAACA  |

Table S1: Primer Sequences used in RT-PCR.

19

20

21

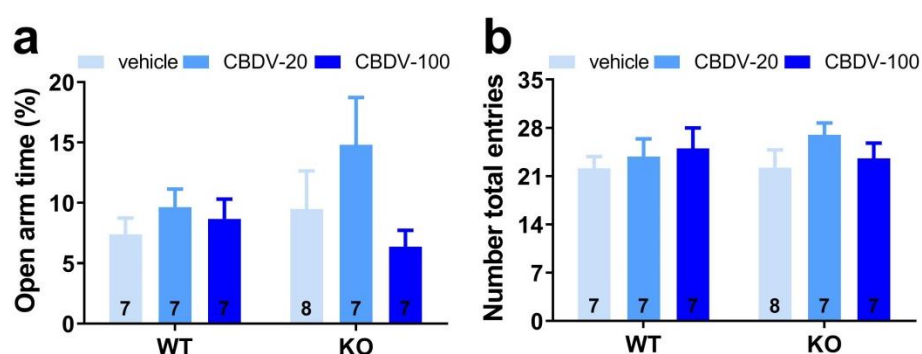

Fig. S1: Effects of adult subchronic CBDV treatment (20 or 100 mg/Kg) in the elevated plus maze (Study 1). Anxiety-like behavior (a) and locomotor activity (b) were measured in WT and Fmr1-KO mice. Data are expressed as mean  $\pm$  SEM. Numbers in histograms indicate sample size for each group.

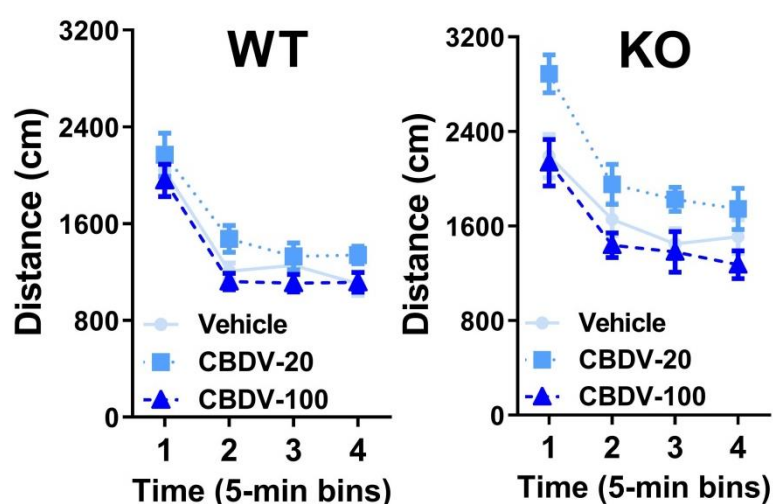

Fig. S2: Effects of adult subchronic CBDV treatment on locomotor habituation in the open field (Study 1). Locomotor activity decreased during the 20-min habituation phase of the object recognition test in all experimental groups. Data are expressed as mean  $\pm$  SEM. N=7-8 as in Fig.2a.

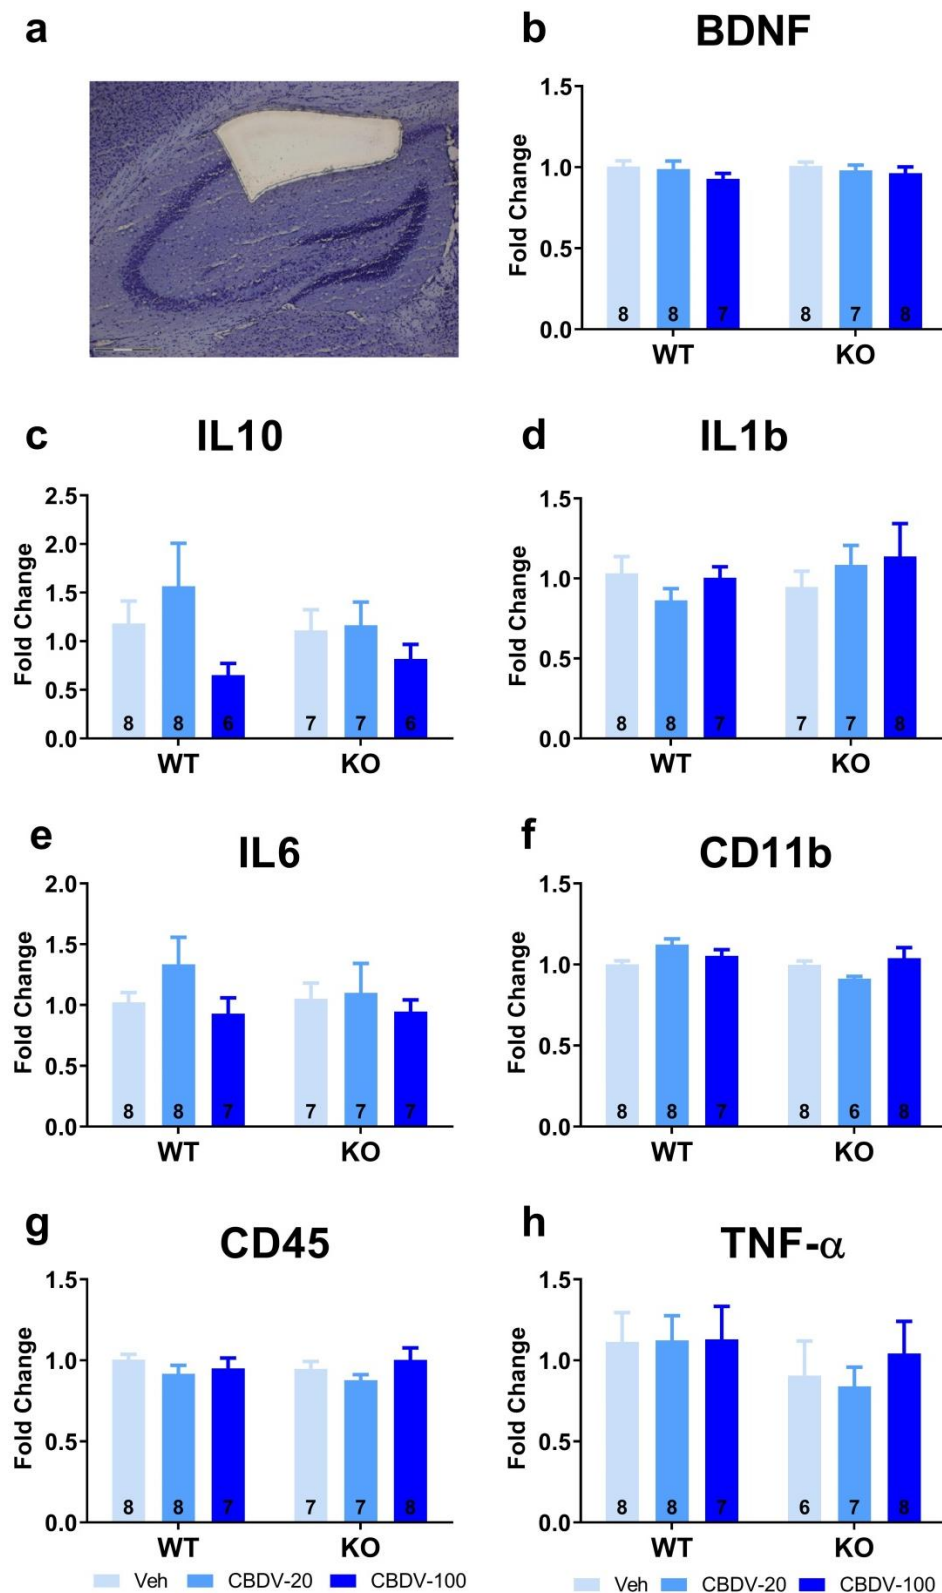

**Fig. S3: Effects of subchronic adult CBDV treatment on the expression of BDNF and inflammatory markers in CA1 (Study 1):** Representative image of CA1 obtained by laser microdissection (a) and levels of plasticity (b) and inflammatory markers (c-h). Data are expressed as mean±SEM. N=6-8 as specified in each graph; differences among dataset were due to the exclusion of outliers using Grubbs' test or extreme studentized deviate ESD method.

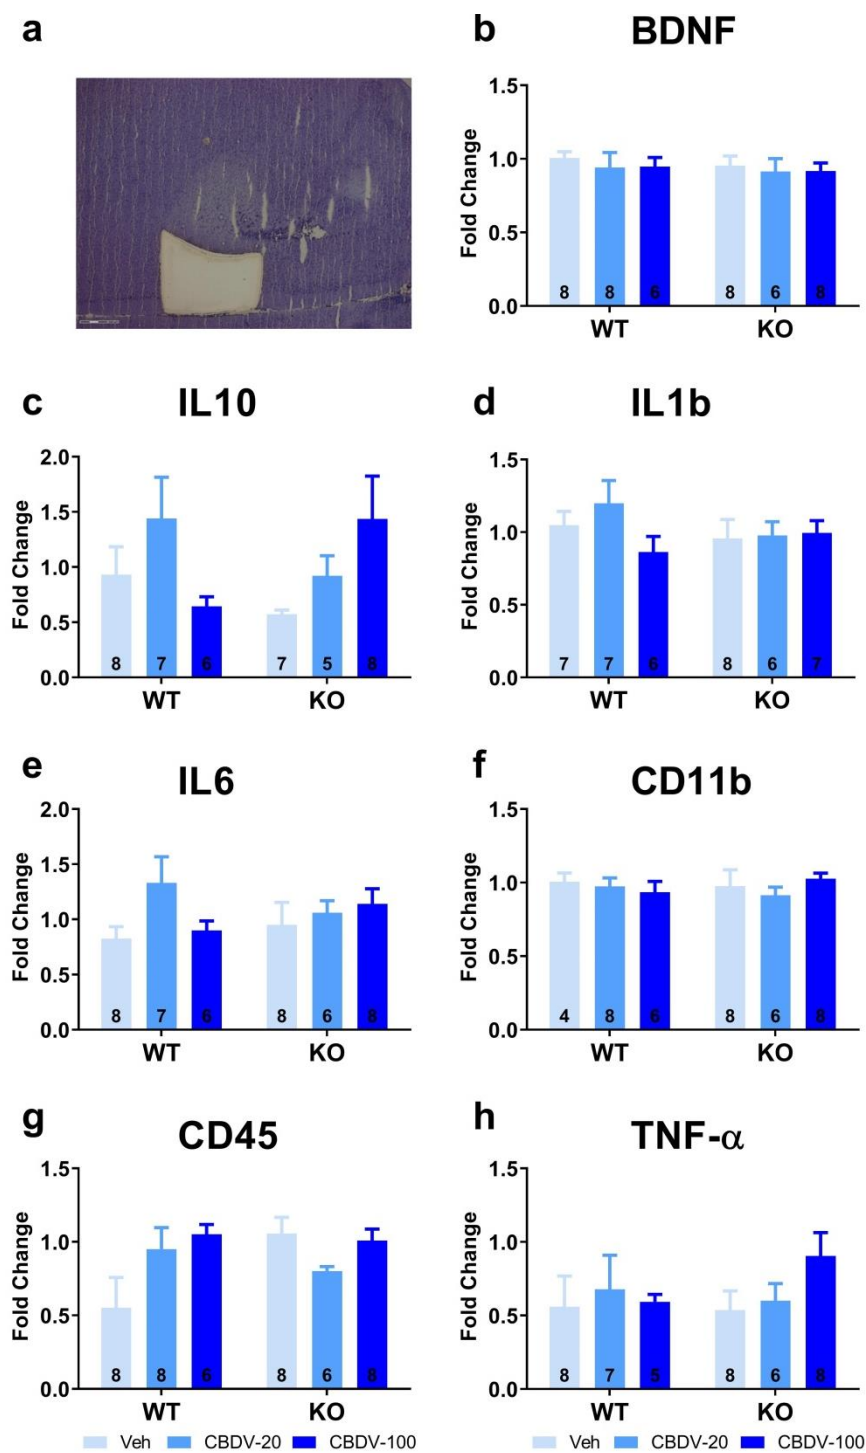

**Fig. S4: Effects of subchronic adult CBDV treatment on the expression of BDNF and inflammatory markers in the prefrontal cortex (Study 1):** Representative image of the prefrontal cortex obtained by laser microdissection (a) and levels of plasticity (b) and inflammatory markers (c-h). Data are expressed as mean±SEM. N=5-8 as specified in each graph; differences among dataset were due to the exclusion of outliers using Grubbs' test or extreme studentized deviate ESD method.

46  
47  
48  
49  
50  
51  
52  
53  
54  
55  
56  
57  
58

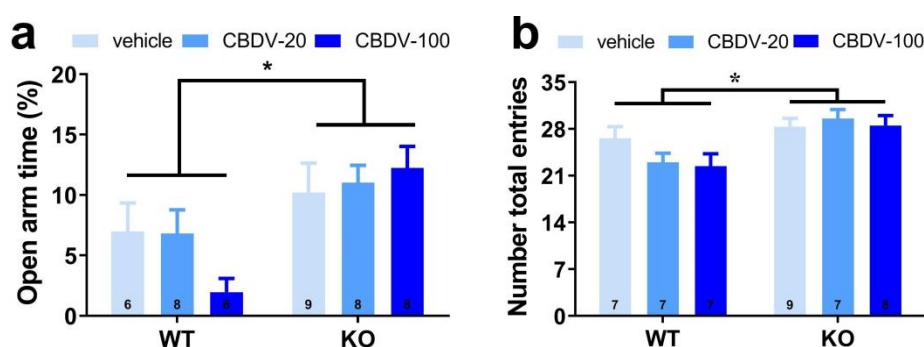

Fig. S5: Effects of juvenile chronic CBDV treatment (20 or 100 mg/Kg) in the elevated plus maze (Study 2). Anxiety-like behavior (a) and locomotor activity (b) were measured in WT and Fmr1-KO mice. Data are expressed as mean  $\pm$  SEM. Numbers in histograms indicate sample size for each group.

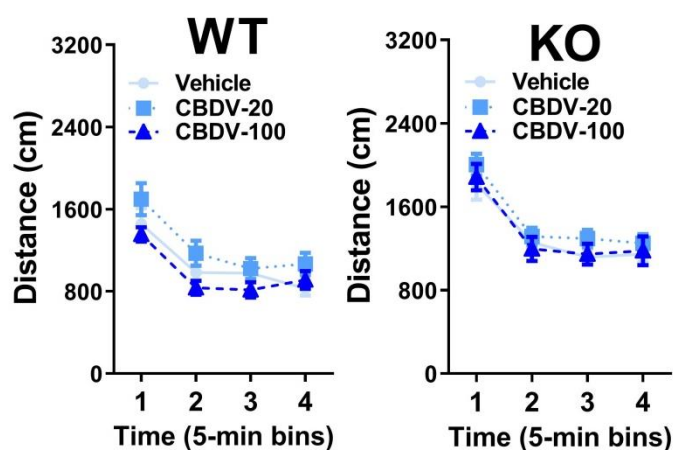

Fig. S6: Effects of juvenile chronic CBDV treatment on locomotor habituation in the open field (Study 2). Locomotor activity decreased during the 20-min habituation phase of the object recognition test in all experimental groups. Data are expressed as mean  $\pm$  SEM. N=7-8 as in Fig.7a.

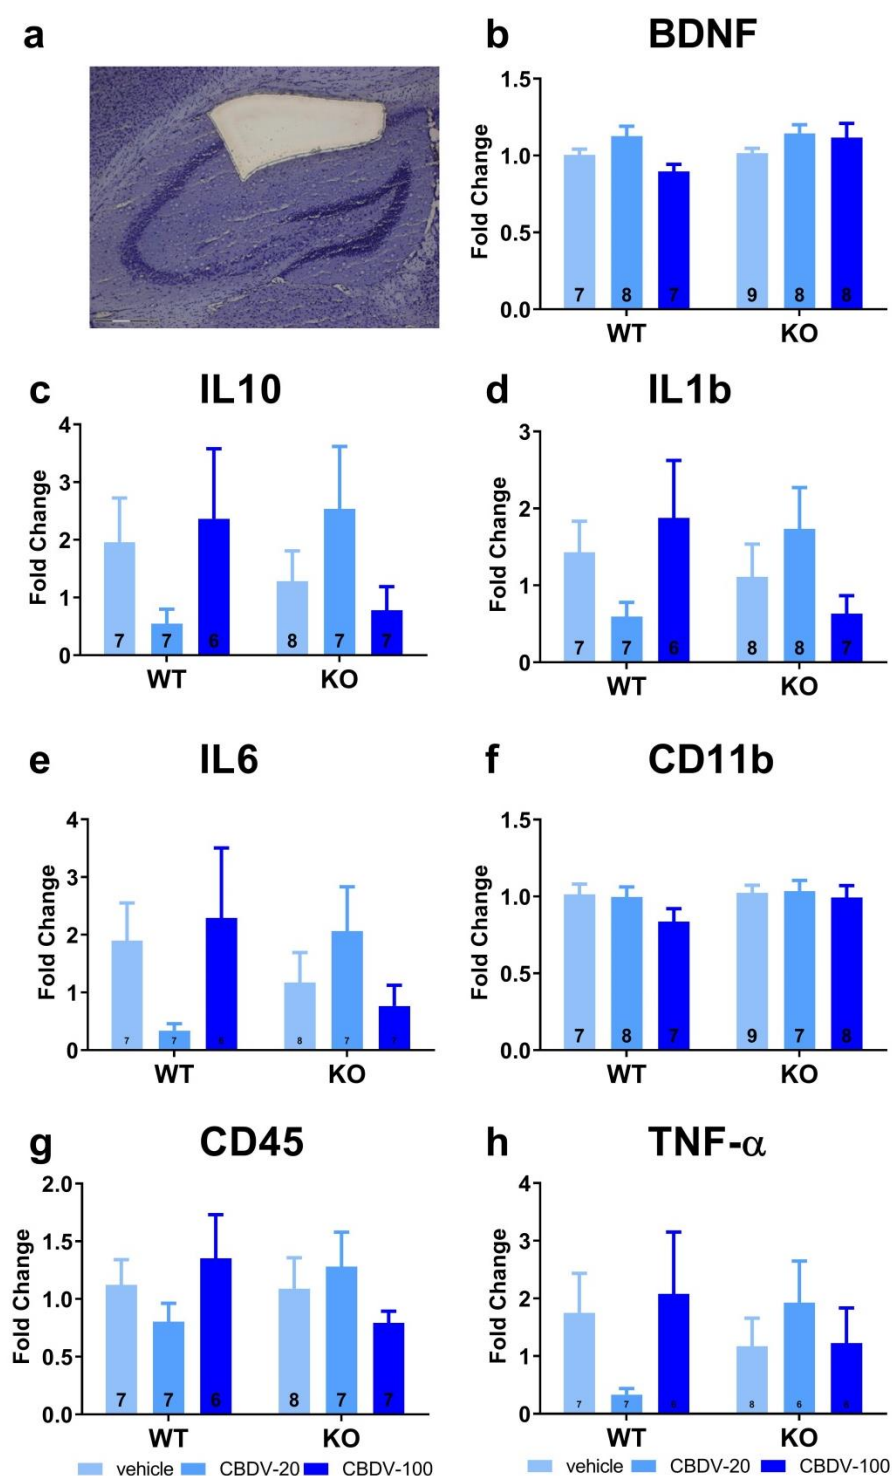

**Fig. S7: Effects of juvenile chronic CBDV treatment on the expression of BDNF and inflammatory markers in CA1 (Study 2):** Representative image of CA1 obtained by laser microdissection (a) and levels of plasticity (b) and inflammatory markers (c-h). Data are expressed as mean±SEM. N=6-8 as specified in each graph; differences among dataset were due to the exclusion of outliers using Grubbs' test or extreme studentized deviate ESD method.

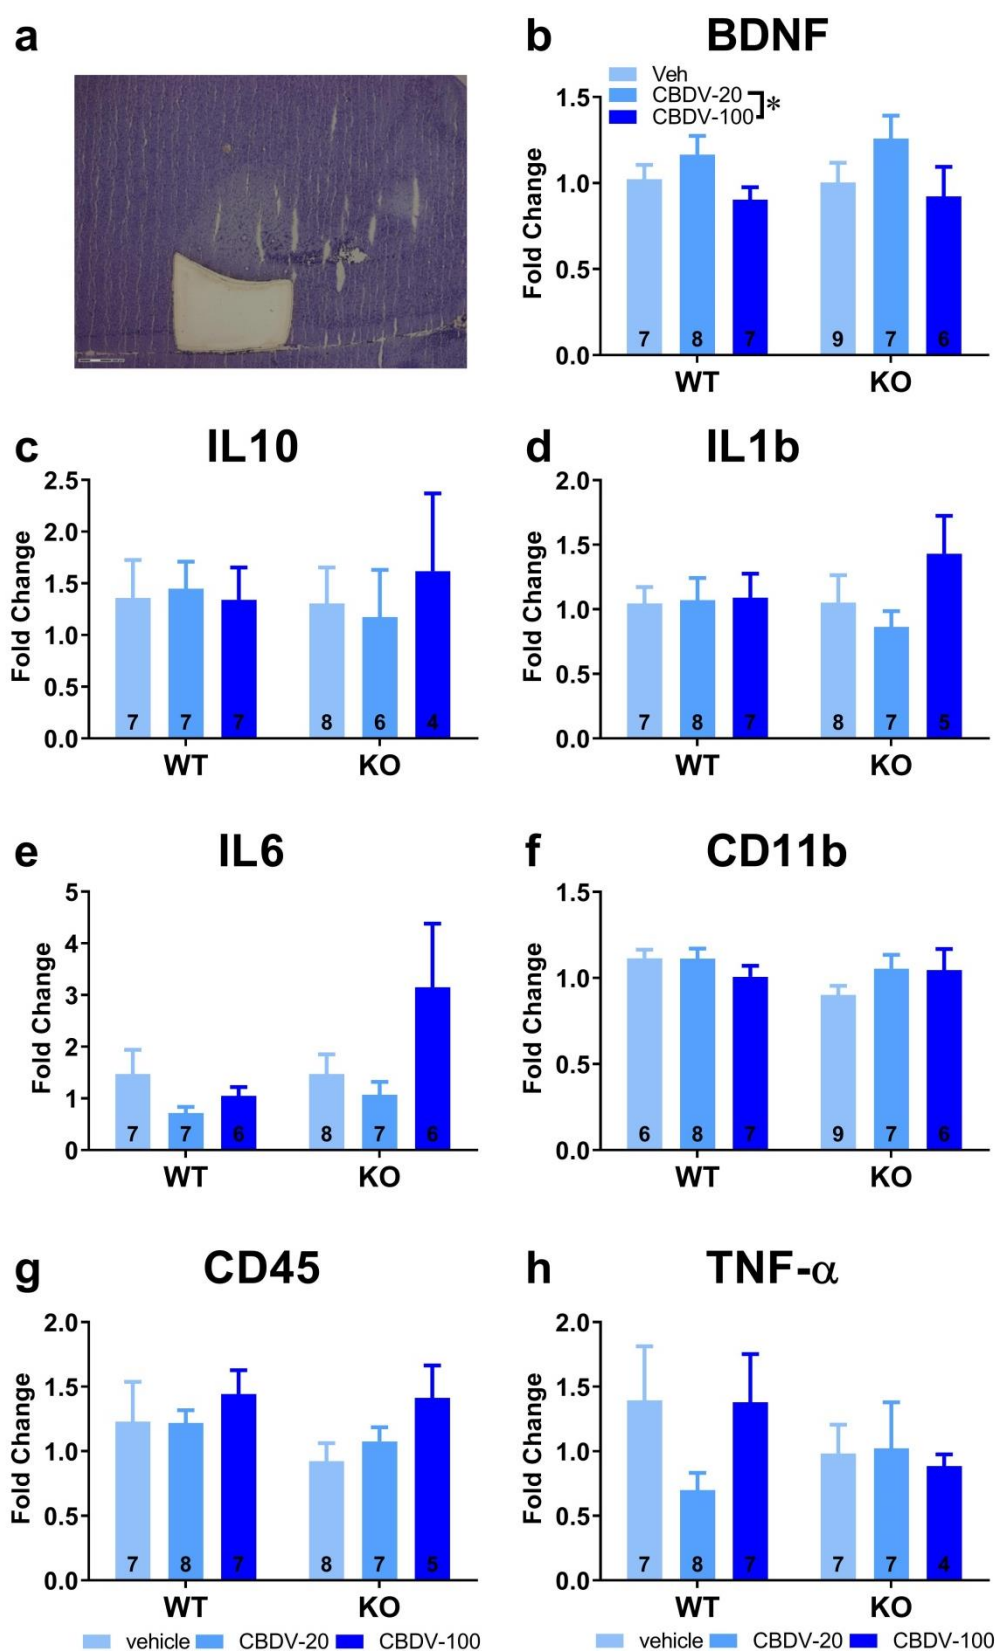

**Fig. S8: Effects of juvenile chronic CBDV treatment on the expression of BDNF and inflammatory markers in the prefrontal cortex (Study 2):** Representative image of the prefrontal cortex obtained by laser microdissection (a) and levels of plasticity (b) and inflammatory markers (c-h). Data are expressed as mean $\pm$ SEM. N=5-8 as specified in each graph; differences among dataset were due to the exclusion of outliers using Grubbs' test or extreme studentized deviate ESD method.
